# Supplementary material for: Creating an electron-rich region on ultrafine Bi2O3 nanoparticles to boost the electrochemical carbon dioxide reduction to formate
Source: Royal Society of Chemistry journal article supplement (doi:10.1039/d2se01274j), 2022-11-22
Supplement: d2se01274j1.pdf [file d2se01274j1.pdf]

**Creating electron-rich region on ultrafine Bi<sub>2</sub>O<sub>3</sub> nanoparticles to boost  
the electrochemical carbon dioxide reduction to formate**

Jiayu Zhan,<sup>a</sup> Lu-Hua Zhang,<sup>\*a</sup> Xueli Wang,<sup>a</sup> Yuqi Hu,<sup>a</sup> Yi Jiang,<sup>\*b</sup> and Fengshou Yu<sup>\*a</sup>

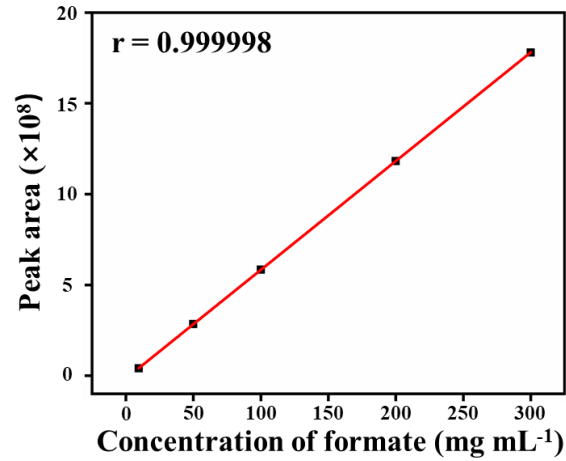

**Figure S1.** Linear relationship between the formate concentration and peak area

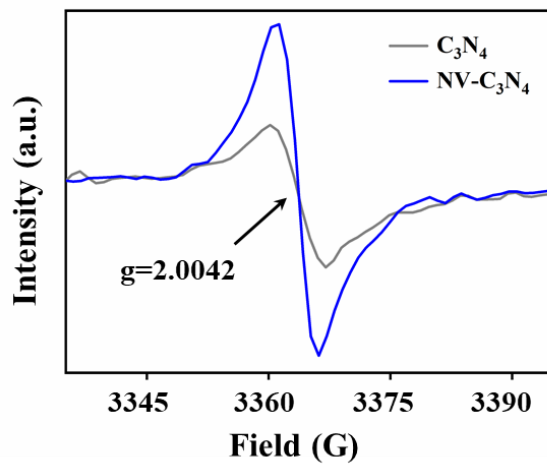

**Figure S2.** Solid EPR spectra of NV-C<sub>3</sub>N<sub>4</sub> and C<sub>3</sub>N<sub>4</sub>

The paramagnetic absorption signal at  $g=2.0042$  corresponds to the unpaired electrons captured by the NVs.

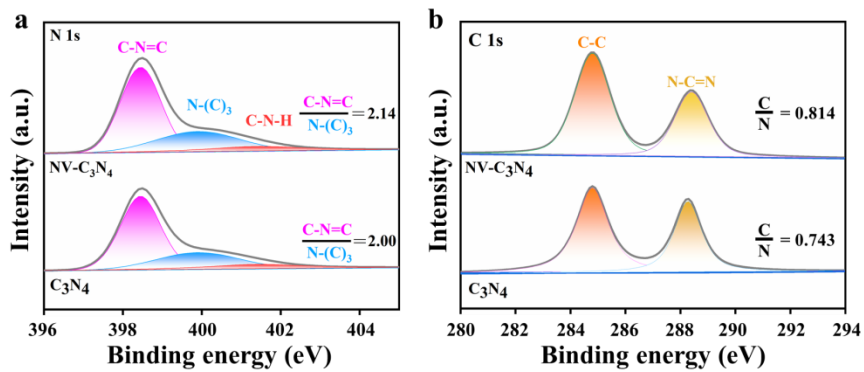

**Figure S3.** (a) N 1s spectra of NV-C<sub>3</sub>N<sub>4</sub> and C<sub>3</sub>N<sub>4</sub>; (b) C 1s spectra of NV-C<sub>3</sub>N<sub>4</sub> and C<sub>3</sub>N<sub>4</sub>

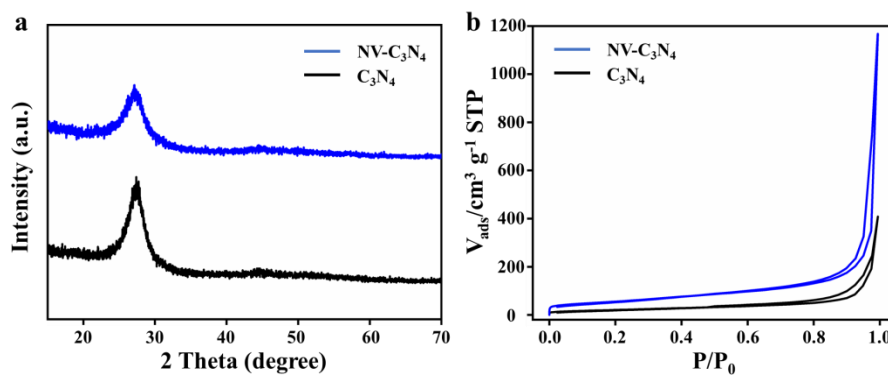

**Figure S4.** (a) XRD patterns and (b) N<sub>2</sub> adsorption isotherms for NV-C<sub>3</sub>N<sub>4</sub> and C<sub>3</sub>N<sub>4</sub>.

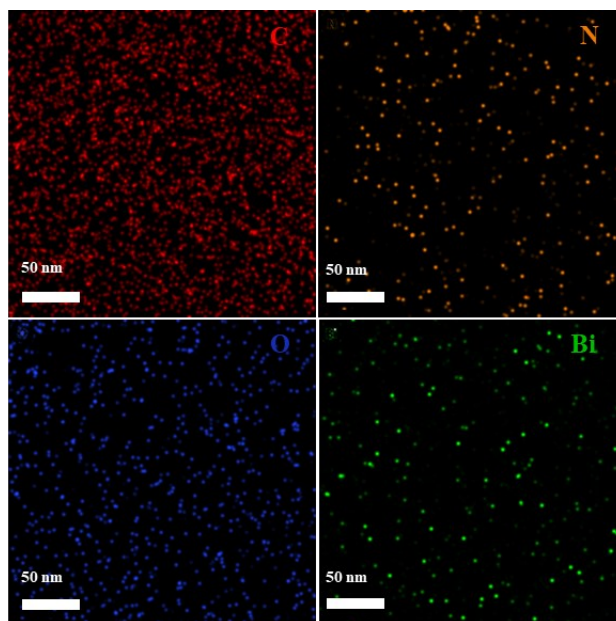

**Figure S5.** element mapping of Bi<sub>2</sub>O<sub>3</sub>/NV-C<sub>3</sub>N<sub>4</sub>.

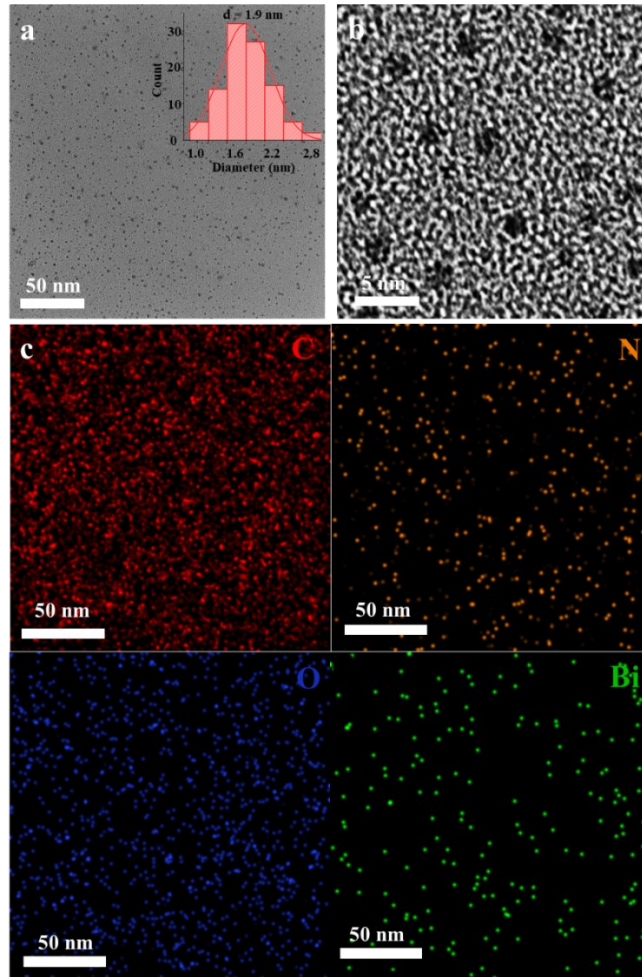

Figure S6. TEM images (a-b) and element mapping (c) of  $\text{Bi}_2\text{O}_3/\text{C}_3\text{N}_4$

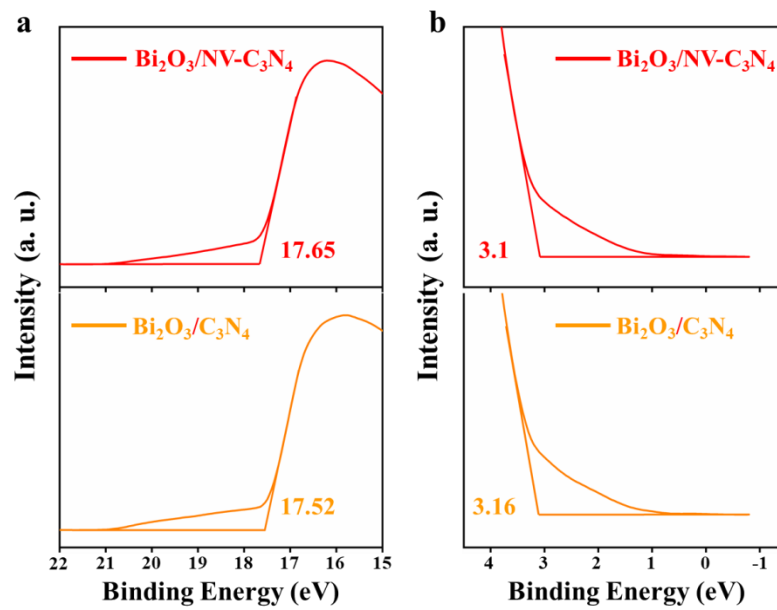

**Figure S7.** (a) Secondary electron cut-off energy ( $E_{\text{cut-off}}$ ) for  $\text{Bi}_2\text{O}_3/\text{NV-C}_3\text{N}_4$  and  $\text{Bi}_2\text{O}_3/\text{C}_3\text{N}_4$  catalysts; (b) Onset( $E_i$ ) energy regions of  $\text{Bi}_2\text{O}_3/\text{NV-C}_3\text{N}_4$  and  $\text{Bi}_2\text{O}_3/\text{C}_3\text{N}_4$  samples. The work function calculated as the following equation,  $\Phi = 21.22 \text{ eV} - (E_{\text{cut-off}} - E_i)$ , is 6.67 eV and 6.86 eV for  $\text{Bi}_2\text{O}_3/\text{NV-C}_3\text{N}_4$  and  $\text{Bi}_2\text{O}_3/\text{C}_3\text{N}_4$  samples

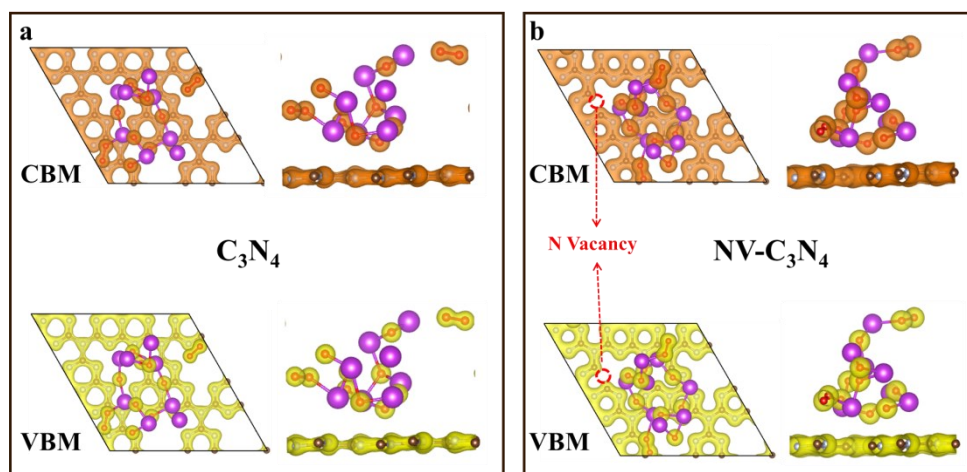

**Figure S8.** The DFT calculations of the electronic structure of (a)  $\text{Bi}_2\text{O}_3/\text{C}_3\text{N}_4$  and (b)  $\text{Bi}_2\text{O}_3/\text{NV-C}_3\text{N}_4$  with corresponding charge distribution of VBM (valence band maximum) and CBM (conduction band minimum).

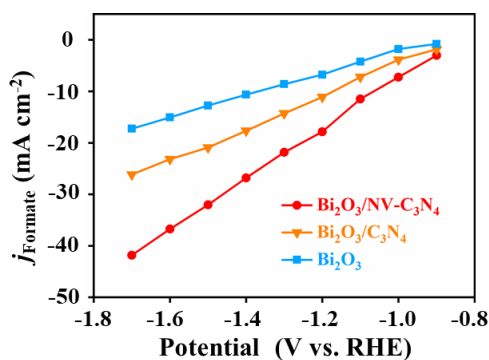

**Figure S9.** Partial current density of formate.

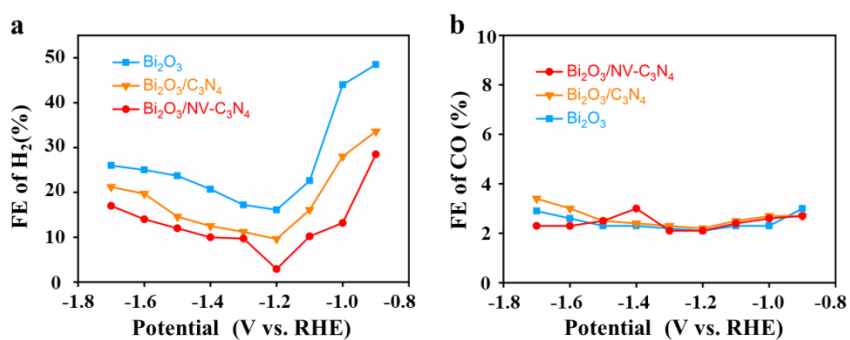

**Figure S10.**  $\text{Bi}_2\text{O}_3$ ,  $\text{Bi}_2\text{O}_3/\text{C}_3\text{N}_4$  and  $\text{Bi}_2\text{O}_3/\text{NV-C}_3\text{N}_4$  (a) FE of  $\text{H}_2$ ; (b) FE of CO.

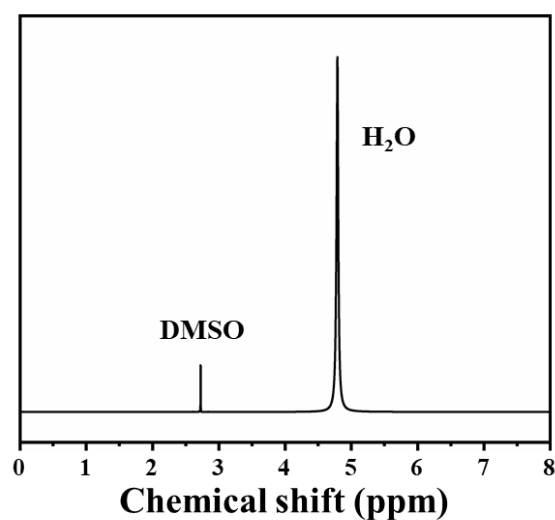

**Figure S11.**  $^1\text{H-NMR}$  spectra of the liquid products from the  $\text{CO}_2\text{RR}$

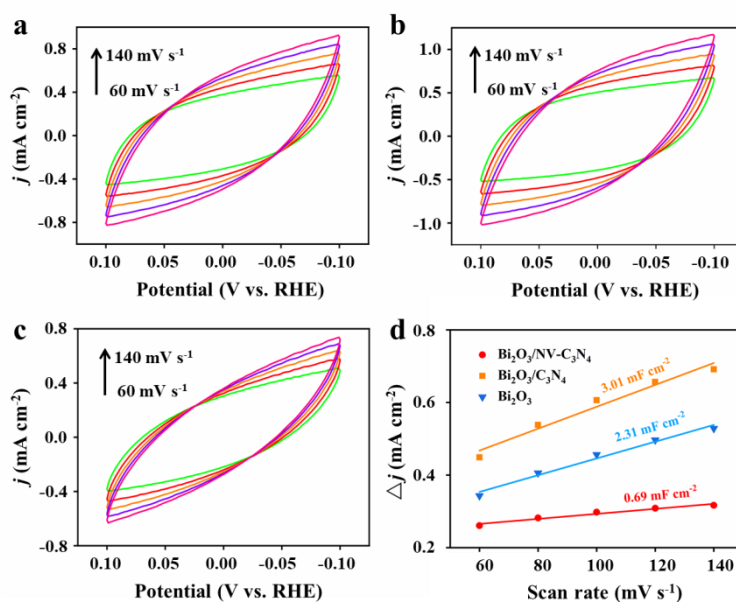

**Figure S12.** Cyclic voltammograms at the range of  $-0.10$  to  $0.10$  V vs. RHE with different scan rates ( $60$ ,  $80$ ,  $100$ ,  $120$  and  $140$   $\text{mV s}^{-1}$ ) (a)  $\text{Bi}_2\text{O}_3$ ; (b)  $\text{Bi}_2\text{O}_3/\text{C}_3\text{N}_4$ ; (c)  $\text{Bi}_2\text{O}_3/\text{NV-C}_3\text{N}_4$ ; (d) Charging current density differences plotted against scan rates.

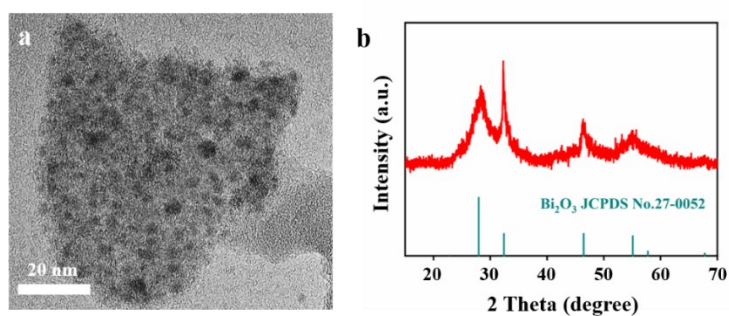

**Figure S13.** Bi<sub>2</sub>O<sub>3</sub>/NV-C<sub>3</sub>N<sub>4</sub> (a) TEM after electrolysis; (b) XRD pattern after electrolysis.

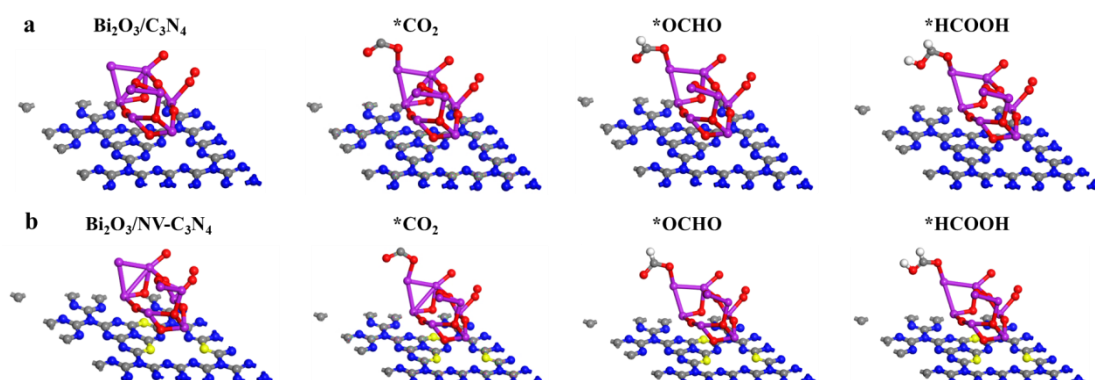

**Figure S14.** Optimized geometric structure models of three intermediate \*CO<sub>2</sub>, \*OCHO and \*HCOOH adsorbed on (a) Bi<sub>2</sub>O<sub>3</sub>/C<sub>3</sub>N<sub>4</sub>, (b) Bi<sub>2</sub>O<sub>3</sub>/NV-C<sub>3</sub>N<sub>4</sub> surfaces; the purple, gray, red, and white spheres represent Bi, C, O, and H atoms, respectively; Especially, the yellow spheres in Bi<sub>2</sub>O<sub>3</sub>/NV-C<sub>3</sub>N<sub>4</sub> represent the removed N atoms.

Table S1. Atomic percentage of different samples

| Samples                                                          | Bi 4f | O 1s  | C 1s  | N 1s  |
|------------------------------------------------------------------|-------|-------|-------|-------|
|                                                                  | at %  | at %  | at %  | at %  |
| C <sub>3</sub> N <sub>4</sub>                                    | ---   | ---   | 42.62 | 57.38 |
| NV-C <sub>3</sub> N <sub>4</sub>                                 | ---   | ---   | 44.90 | 55.10 |
| Bi <sub>2</sub> O <sub>3</sub>                                   | 18.79 | 52.47 | 28.74 | ---   |
| Bi <sub>2</sub> O <sub>3</sub> /C <sub>3</sub> N <sub>4</sub>    | 17.03 | 44.22 | 25.92 | 12.83 |
| Bi <sub>2</sub> O <sub>3</sub> /NV-C <sub>3</sub> N <sub>4</sub> | 13.22 | 34.46 | 30.84 | 21.49 |

**Table S2.** Electrochemical CO<sub>2</sub> reduction performance of different Bi-based catalysts.

| Catalysts                                                        | Maximum                   | Potential range of         | Stability time (h) | Reference |
|------------------------------------------------------------------|---------------------------|----------------------------|--------------------|-----------|
|                                                                  | FE <sub>Formate</sub> (%) | FE <sub>Formate</sub> >80% |                    |           |
| Bi <sub>2</sub> O <sub>3</sub> /NV-C <sub>3</sub> N <sub>4</sub> | 95                        | 700                        | 24                 | This work |
| Bi/rGO                                                           | 98                        | 400                        | 12                 | [1]       |
| Bi@NPC                                                           | 92                        | 400                        | 24                 | [2]       |
| Bi (PC-6c)                                                       | 100                       | 400                        | 10                 | [3]       |

|               |      |     |    |     |
|---------------|------|-----|----|-----|
| Bi(B)-2       | 95   | 600 | 12 | [4] |
| Bi nanosheets | 86   | 200 | 10 | [5] |
| Bi nanotubes  | 97   | 600 | 10 | [6] |
| Bi-001        | 95.9 | 200 | 16 | [7] |
| Bi NP@MWCNTs  | 95.2 | 100 | 10 | [8] |

## References

- [1] Y. X. Duan, K. H. Liu, Q. Zhang, J. M. Yan, Q. Jiang, *Small Methods* **2020**, *4*.
- [2] D. Zhang, Z. Tao, F. Feng, B. He, W. Zhou, J. Sun, J. Xu, Q. Wang, L. Zhao, *Electrochim. Acta* **2020**, *334*.
- [3] S. Kim, W. J. Dong, S. Gim, W. Sohn, J. Y. Park, C. J. Yoo, H. W. Jang, J.-L. Lee, *Nano Energy* **2017**, *39*, 44-52.
- [4] X. Chen, H. Chen, W. Zhou, Q. Zhang, Z. Yang, Z. Li, F. Yang, D. Wang, J. Ye, L. Liu, *Small* **2021**, *17*, e2101128.
- [5] W. Zhang, Y. Hu, L. Ma, G. Zhu, P. Zhao, X. Xue, R. Chen, S. Yang, J. Ma, J. Liu, Z. Jin, *Nano Energy* **2018**, *53*, 808-816.
- [6] K. Fan, Y. Jia, Y. Ji, P. Kuang, B. Zhu, X. Liu, J. Yu, *ACS Catal.* **2019**, *10*, 358-364.
- [7] D. Wu, J. Liu, Y. Liang, K. Xiang, X. Z. Fu, J. L. Luo, *ChemSusChem* **2019**, *12*, 4700-4707.
- [8] X. Zhang, J. Fu, Y. Liu, X.-D. Zhou, J. Qiao, *ACS Sustainable Chem. Eng.* **2020**, *8*, 4871-4876.
